# Supplementary material
Source: MDPI journal article supplement (https://www.mdpi.com/2073-4344/11/11/1396)
Supplement: s1 [file s1]

# Influence of Synthesis Approach on Controlled Microstructures and Photocatalytic Properties of Ag/AgBr-Activated Carbon Composites on Visible Light Degradation of Tetracycline

Saheed O. Sanni <sup>1,2,\*</sup>, Hendrik G. Brink <sup>1</sup> and Elvera L. Viljoen <sup>2</sup>

<sup>1</sup> Department of Chemical Engineering, Faculty of Engineering, Built Environment and Information Technology, University of Pretoria, Pretoria 0028, South Africa; deon.brink@up.ac.za

<sup>2</sup> Biosorption and Wastewater Treatment Research Laboratory, Department of Chemistry, Faculty of Applied and Computer Sciences, Vaal University of Technology, Vanderbijlpark 1900, South Africa; elverav@vut.ac.za

\* Correspondence: saheed.sanni@up.ac.za

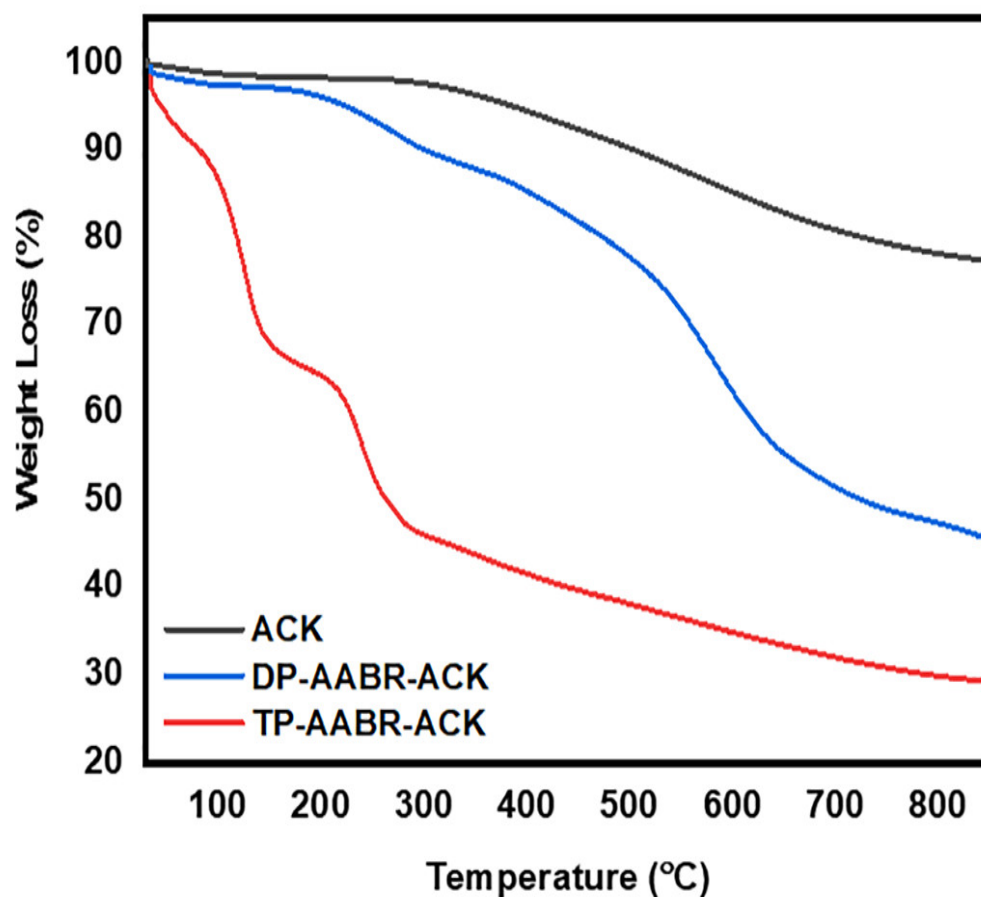

Figure S1. Thermogravimetric analysis of ACK, DP-AABR-ACK, and TP-AABR-ACK.

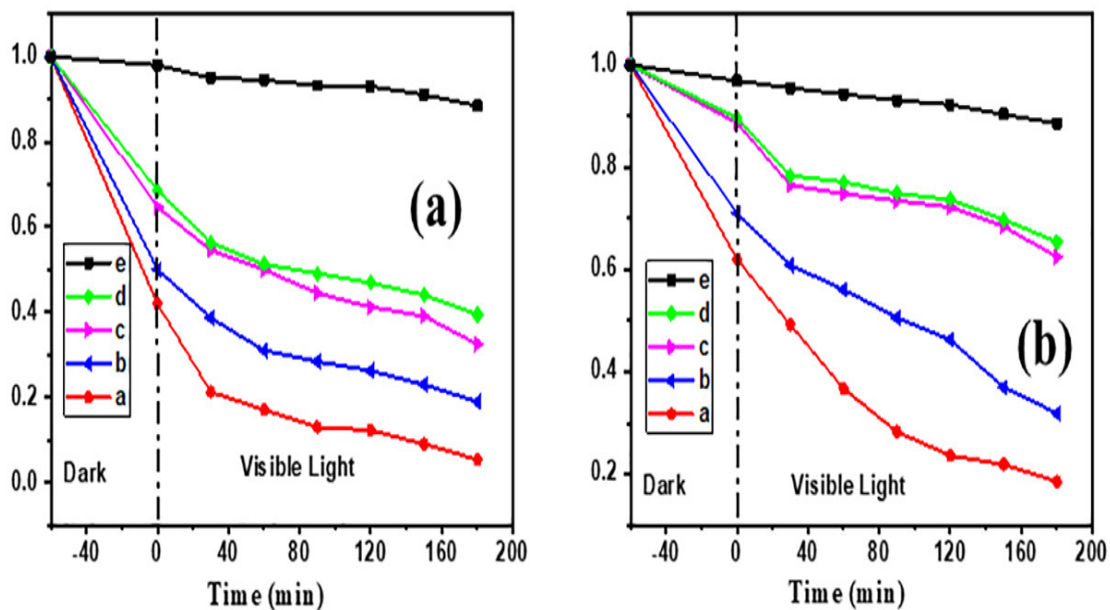

**Figure S2.** Photocatalytic degradation efficiencies of (A) ciprofloxacin, and (B) rhodamine B as a function of irradiation time for (a) TP-AABR-ACK, (b) DP-AABR-ACK, (c) TP-AABR, (d) DP-AABR and (e) photolysis.

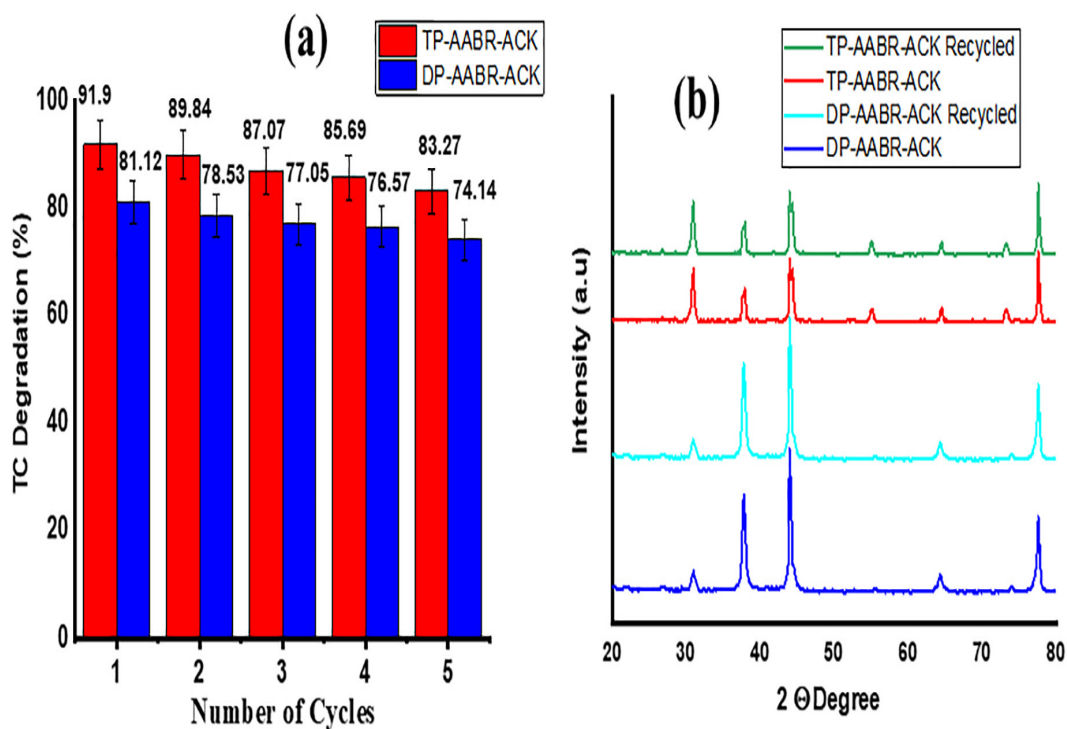

**Figure S3.** Reusability test AABR-ACK nanocomposites for the degradation of TC under LED visible light illumination, and (b) XRD patterns of the AABR-ACK nanocomposites prior, and then afterward test.
